# Supplementary material for: Notable effect of water on excess electron attachment to aqueous DNA deoxyribonucleosides
Source: Royal Society of Chemistry journal article supplement (doi:10.1039/c9cp00536f), 2019-01-01
Supplement: c9cp00536f1.pdf [file c9cp00536f1.pdf]

Electronic supplementary information for

## Notable Effect of Water in Excess Electron Attachment to Aqueous DNA Deoxyribonucleosides

Yan Zhang,<sup>a,\*</sup> Jiayue Wang,<sup>b</sup> Songqiu Yang<sup>b</sup>

<sup>a</sup>Institute of Molecular Sciences and Engineering, Shandong University, Qingdao, Binhai Road 72, Qingdao 266237, China.

<sup>b</sup>State Key Laboratory of Molecular Reaction Dynamics, Dalian Institute of Chemical Physics, Chinese Academy of Science, Zhongshan Road 457, Dalian 116023, China.

**Corresponding Authors:**

\*Email: yan-zhang@sdu.edu.cn

## List of Content

|                                                                                                         |     |
|---------------------------------------------------------------------------------------------------------|-----|
| Figure S1. Structures of Four DNA dRNs. ....                                                            | S3  |
| Figure S2. Root-mean-square Deviation (RMSD) of 2000 ps MD Simulations. ....                            | S4  |
| Figure S3. QM/MM Mean VEAs and AEAs of Aqueous Adenine Computed by 5, 10, 20, 30, and 40 Snapshots..... | S5  |
| Figure S4. Vertical Electron Affinities (VEAs) of QM/MM Computations for 20 Snapshots. ....             | S6  |
| Figure S5. dA S1650 LUMO of Neutral Calculations.....                                                   | S7  |
| Figure S6. LUMOs of Four Gas dRNs. ....                                                                 | S8  |
| Figure S7. Adiabatic Electron Affinities (AEAs) of QM/MM Computations for 20 Snapshots. ....            | S9  |
| Figure S8. Vertical Detachment Energies (VDEs) of QM/MM Computations for 20 Snapshots. ....             | S10 |
| Table S1. Averaged numbers of atoms in QM regions of different sizes ( $R_{QM}$ in Å). ....             | S11 |
| Table S2. Standard errors (SEs) of VEA, AEA, and VDEs (eV). ....                                        | S12 |
| Table S3. Spin densities of anionic SP calculations at neutral and anionic optimized geometries. ....   | S13 |

**Figure S1.** Structures of Four DNA dRNs.

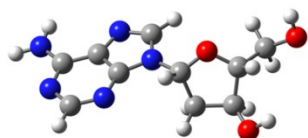

**Deoxyadenosine (dA)**

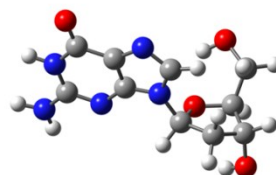

**Deoxyguanosine (dG)**

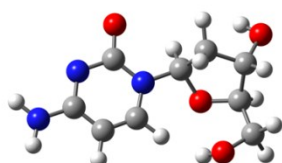

**Deoxycytidine (dC)**

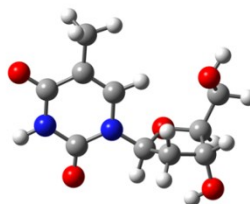

**Deoxythymidine (dT)**

**Figure S2.** Root-mean-square Deviation (RMSD) of 2000 ps MD Simulations.

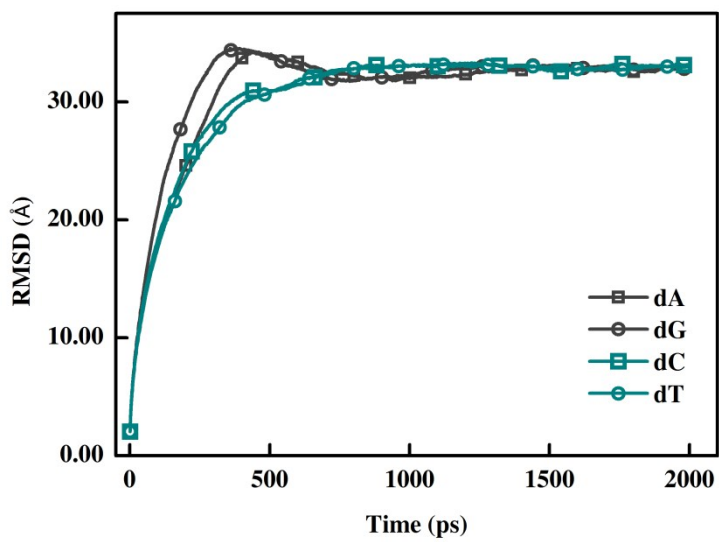

**Figure S3.** QM/MM Mean VEAs and AEA of Aqueous Adenine Computed by 5, 10, 20, 30, and 40 Snapshots.

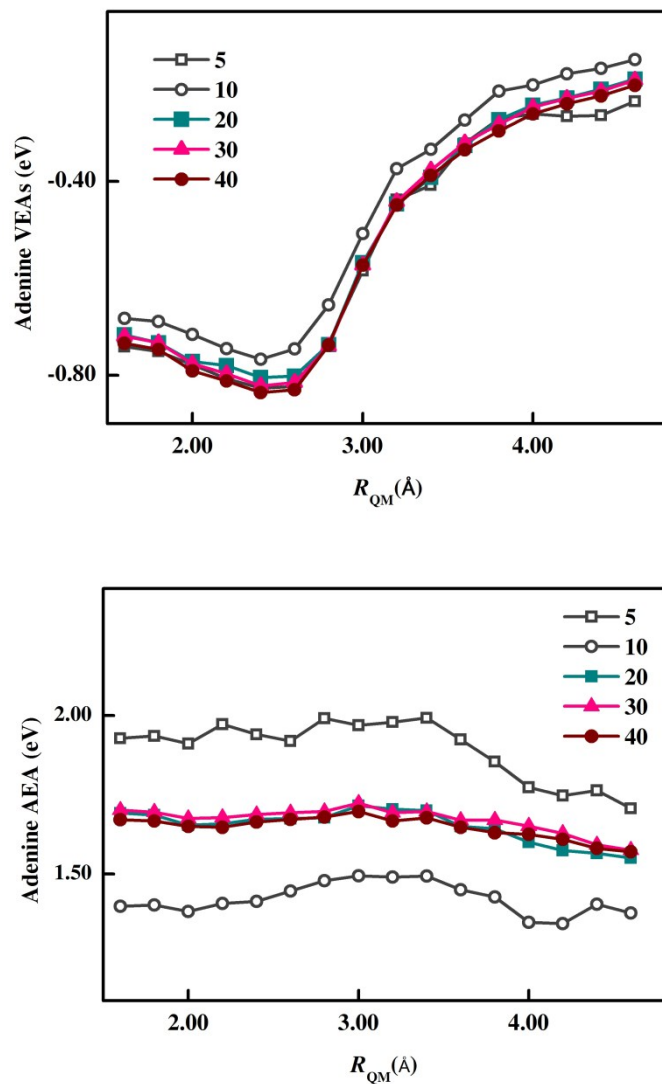

**Figure S4.** Vertical Electron Affinities (VEAs) of QM/MM Computations for 20 Snapshots.

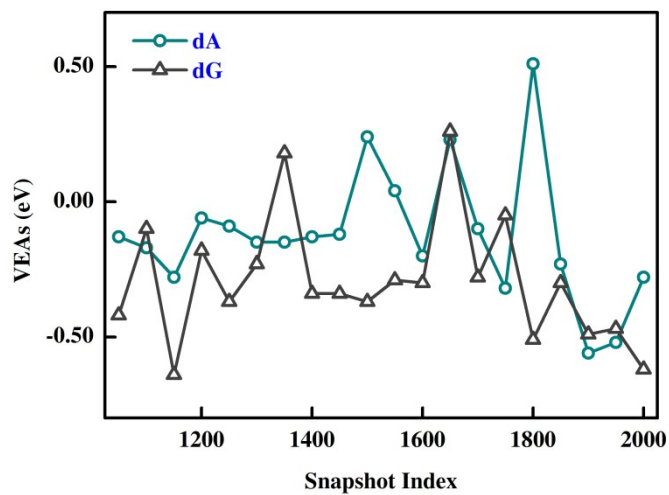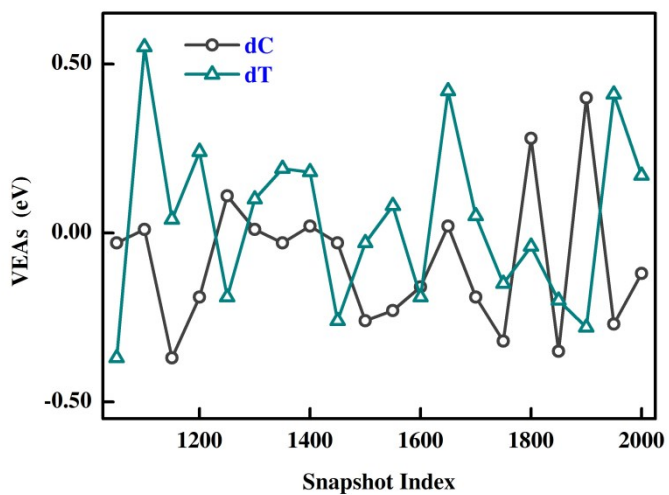

**Figure S5.** dA S1650 LUMO of Neutral Calculations.

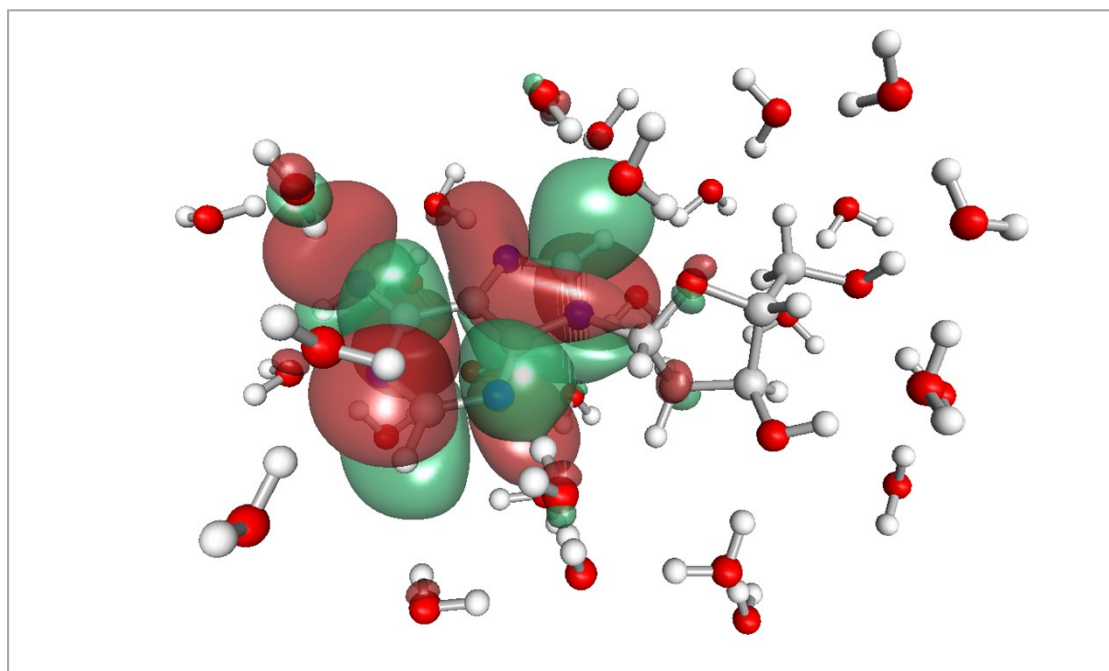

**Figure S6.** LUMOs of Four Gas dRNs.

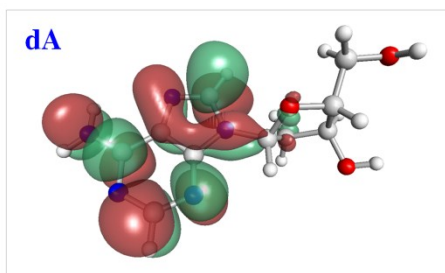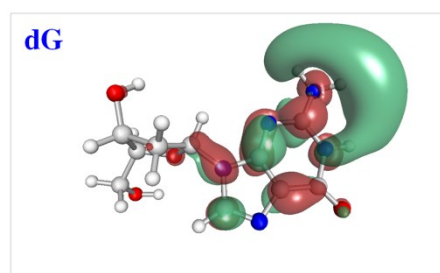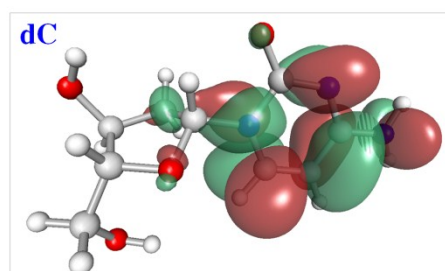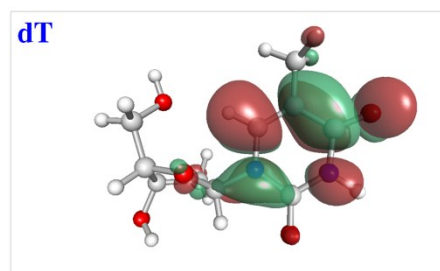



**Figure S7.** Adiabatic Electron Affinities (AEAs) of QM/MM Computations for 20 Snapshots.

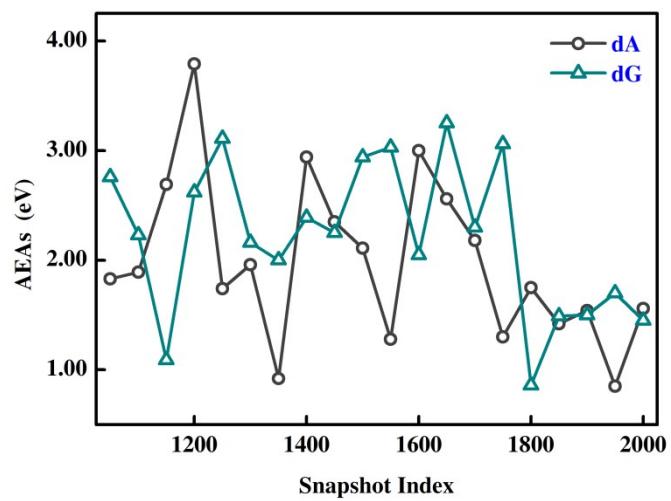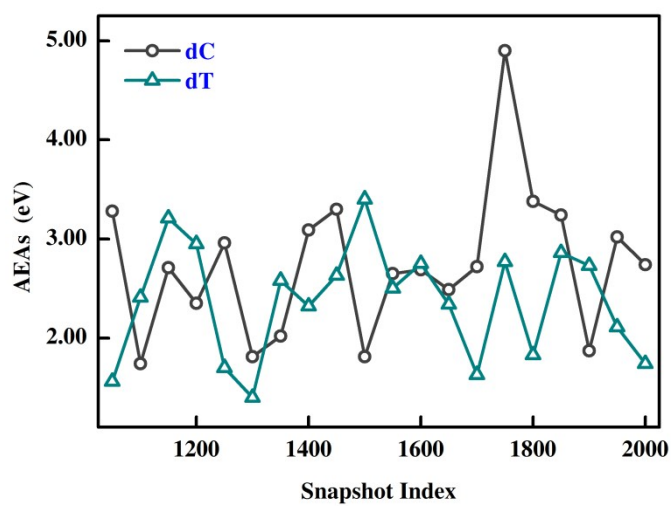

**Figure S8.** Vertical Detachment Energies (VDEs) of QM/MM Computations for 20 Snapshots.

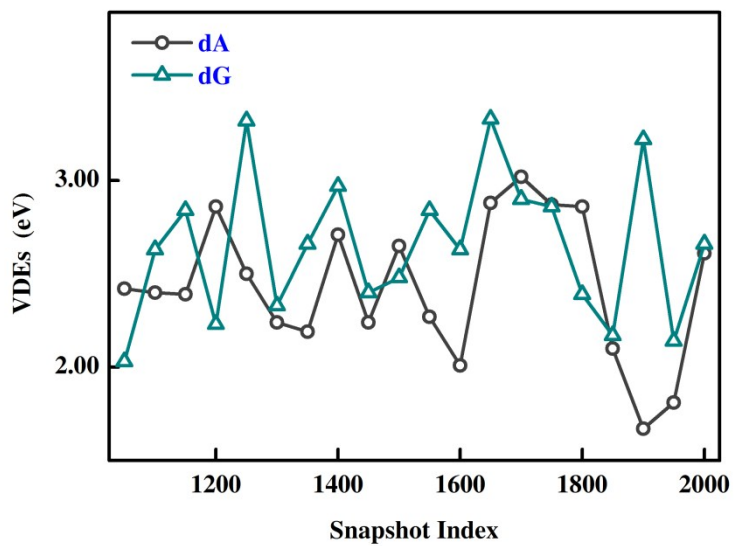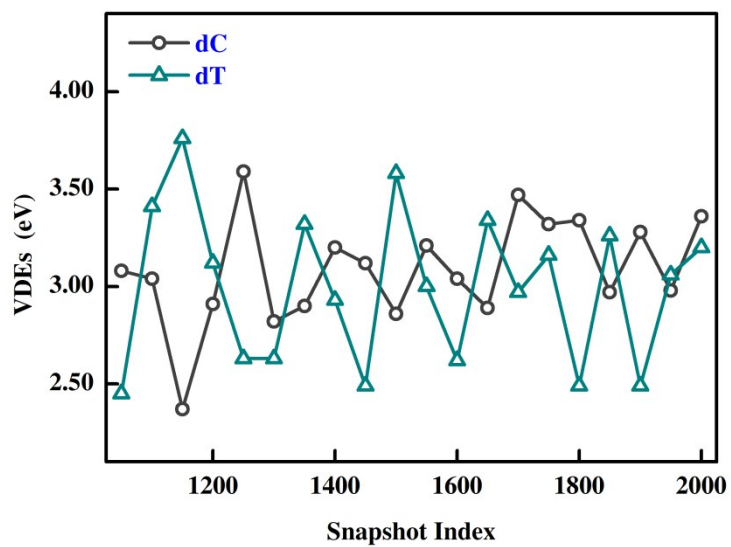

**Table S1.** Averaged numbers of atoms in QM regions of different sizes ( $R_{QM}$  in Å).

| $R_{QM}$ | dA  | dG  | dC  | dT  |
|----------|-----|-----|-----|-----|
| 1.6      | 31  | 32  | 29  | 31  |
| 1.8      | 32  | 33  | 30  | 32  |
| 2.0      | 37  | 36  | 34  | 36  |
| 2.2      | 41  | 40  | 37  | 38  |
| 2.4      | 43  | 45  | 40  | 39  |
| 2.6      | 51  | 52  | 46  | 46  |
| 2.8      | 64  | 68  | 61  | 61  |
| 3        | 84  | 88  | 82  | 81  |
| 3.2      | 104 | 104 | 97  | 98  |
| 3.4      | 121 | 122 | 109 | 111 |
| 3.6      | 134 | 134 | 119 | 125 |
| 3.8      | 148 | 143 | 129 | 139 |
| 4        | 161 | 157 | 144 | 150 |
| 4.2      | 172 | 169 | 158 | 162 |
| 4.4      | 182 | 181 | 169 | 176 |
| 4.6      | 195 | 194 | 180 | 189 |
| 4.8      | 209 | 208 | 194 | 201 |

**Table S2.** Standard errors (SEs) of VEA, AEA, and VDEs (eV).

|    | VEA   |        | AEA   |        |        | VDE   |        |
|----|-------|--------|-------|--------|--------|-------|--------|
|    | QM/MM | gas-QM | QM/MM | pol-QM | gas-QM | QM/MM | gas-QM |
| dA | 0.05  | 0.08   | 0.17  | 0.16   | 0.07   | 0.08  | 0.07   |
| dG | 0.05  | 0.06   | 0.16  | 0.21   | 0.08   | 0.09  | 0.09   |
| dC | 0.05  | 0.06   | 0.17  | 0.17   | 0.07   | 0.06  | 0.09   |
| dT | 0.06  | 0.06   | 0.13  | 0.16   | 0.08   | 0.09  | 0.08   |

**Table S3.** Spin densities of anionic SP calculations at neutral and anionic optimized geometries.

|           | <b>Neutral OPT</b> |              | <b>Anionic OPT</b> |              |
|-----------|--------------------|--------------|--------------------|--------------|
|           | <b>dRN</b>         | <b>bases</b> | <b>dRN</b>         | <b>bases</b> |
| <b>dA</b> | <b>0.69</b>        | <b>0.64</b>  | <b>0.97</b>        | <b>0.95</b>  |
| <b>dG</b> | <b>0.60</b>        | <b>0.53</b>  | <b>0.94</b>        | <b>0.87</b>  |
| <b>dC</b> | <b>0.75</b>        | <b>0.64</b>  | <b>0.97</b>        | <b>0.83</b>  |
| <b>dT</b> | <b>0.82</b>        | <b>0.71</b>  | <b>0.98</b>        | <b>0.86</b>  |
